# Supplementary material for: Silica In Silico: A Molecular Dynamics Characterization of the Early Stages of Protein Embedding for Atom Probe Tomography
Source: MDPI journal article supplement (doi:10.3390/biophysica3020018), 2023-04-11
Supplement: s1 [file s1]

# Supplementary Data for “Silica in Silico: A Molecular Dynamics Characterization of the Early Stages of Protein Embedding for Atom Probe Tomography”

Giovanni Novi Inverardi <sup>1,2</sup>, Francesco Carnovale<sup>1,2</sup>, Lorenzo Petrolli<sup>1,2</sup>,  
Simone Taioli<sup>2,3,4</sup> and Gianluca Lattanzi <sup>1,2,\*</sup>

<sup>1</sup> *Department of Physics, University of Trento, via Sommarive, 14 I-38123 Trento, Italy*

<sup>2</sup> *INFN-TIFPA, Trento Institute for Fundamental Physics and Applications, I-38123  
Trento, Italy*

<sup>3</sup> *European Centre for Theoretical Studies in Nuclear Physics and Related Areas (ECT\*),  
Bruno Kessler Foundation, Trento, Italy*

<sup>4</sup> *Faculty of Applied Physics and Mathematics, Gdańsk University of Technology, Gdańsk,  
Poland*

## 1 Water-silica system

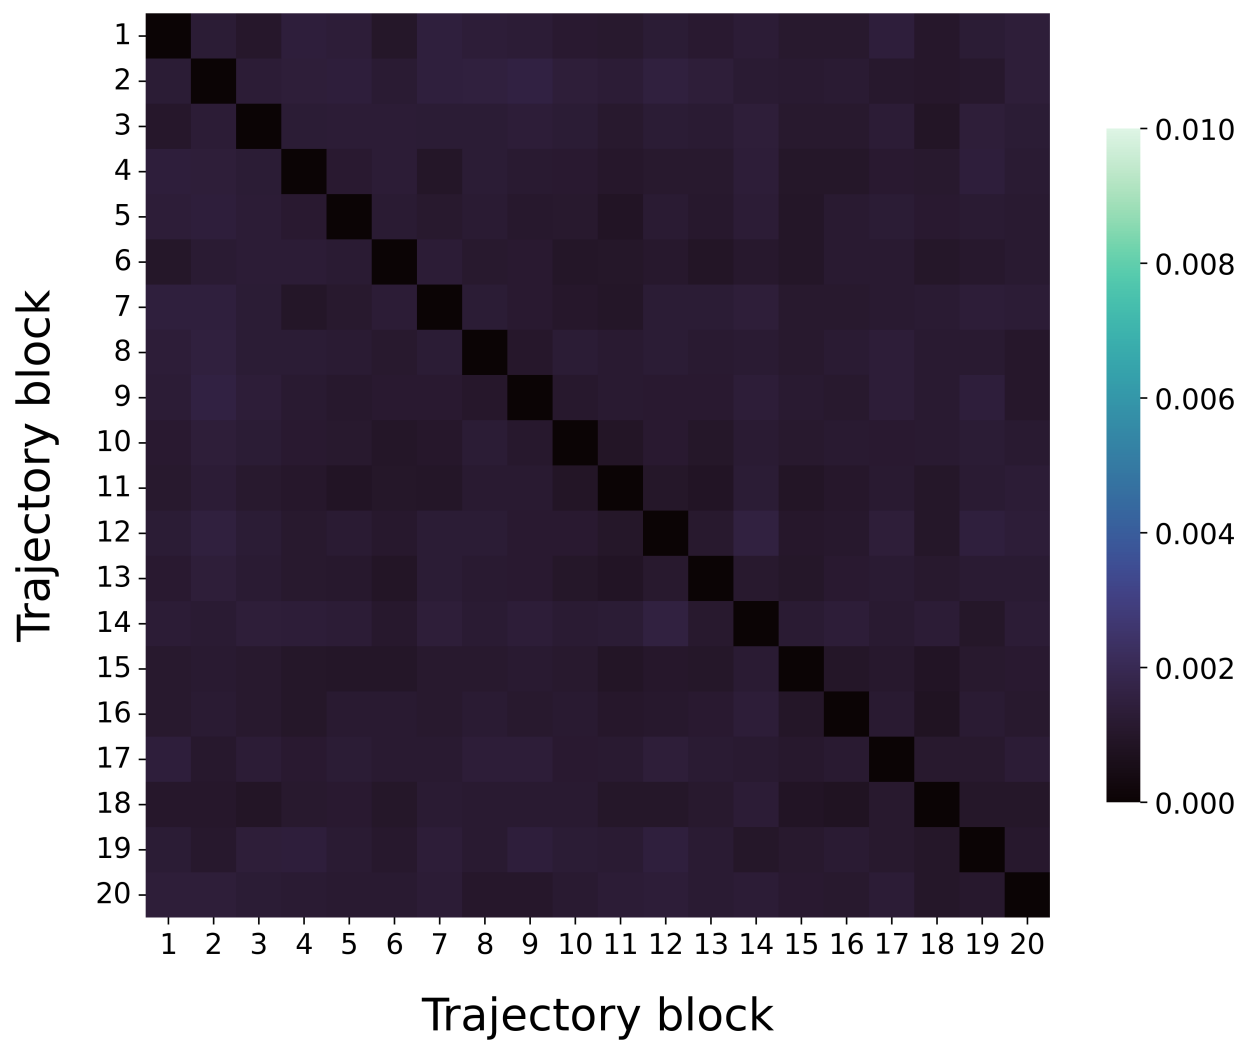

Figure S1: Heatmap of the Jensen-Shannon divergence between the radial distribution functions (RDF) associated with each (25-nanosecond) block of the trajectory of the water-silica system.

## 2 Ubiquitin systems

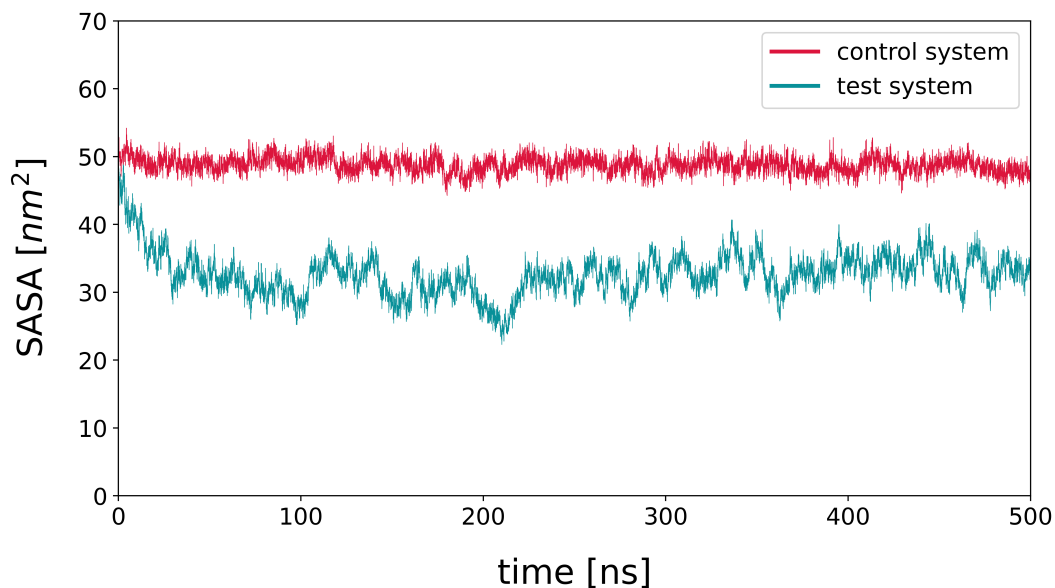

Figure S2: Solvent-accessible surface area (SASA) of ubiquitin in the *control* (red) and *test* (blue) scenarios. The decreasing trend observed in the latter is accounted for by orthosilicic acid partially replacing water molecules on the surface of ubiquitin.

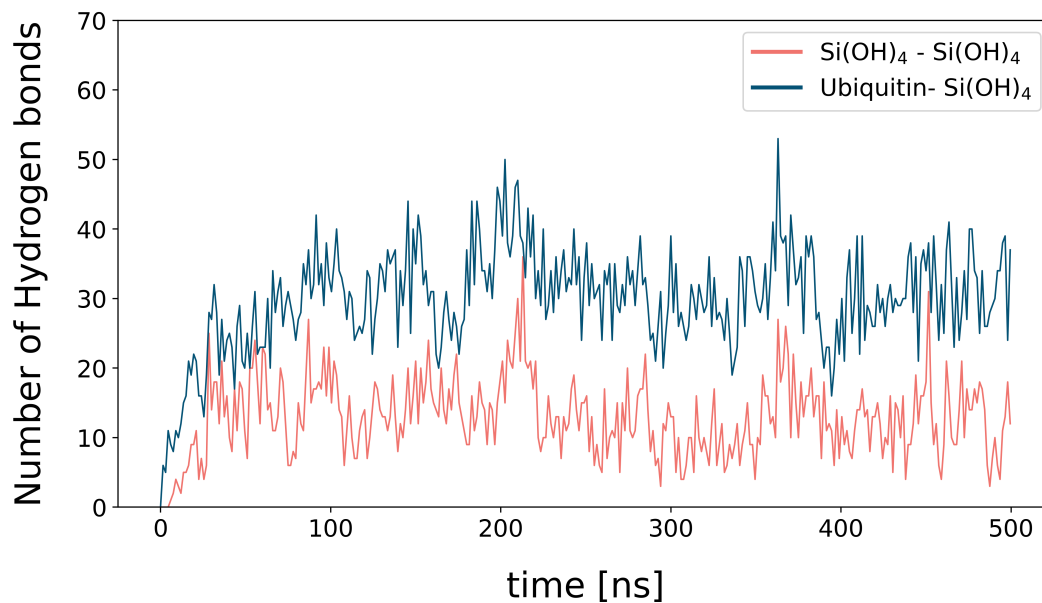

Figure S3: Total amount of hydrogen bonds between ubiquitin and  $\text{Si(OH)}_4$  molecules (blue), and between  $\text{Si(OH)}_4$  molecules lying within 5 Å of the protein surface (red).

### 3 SUMO-1 systems

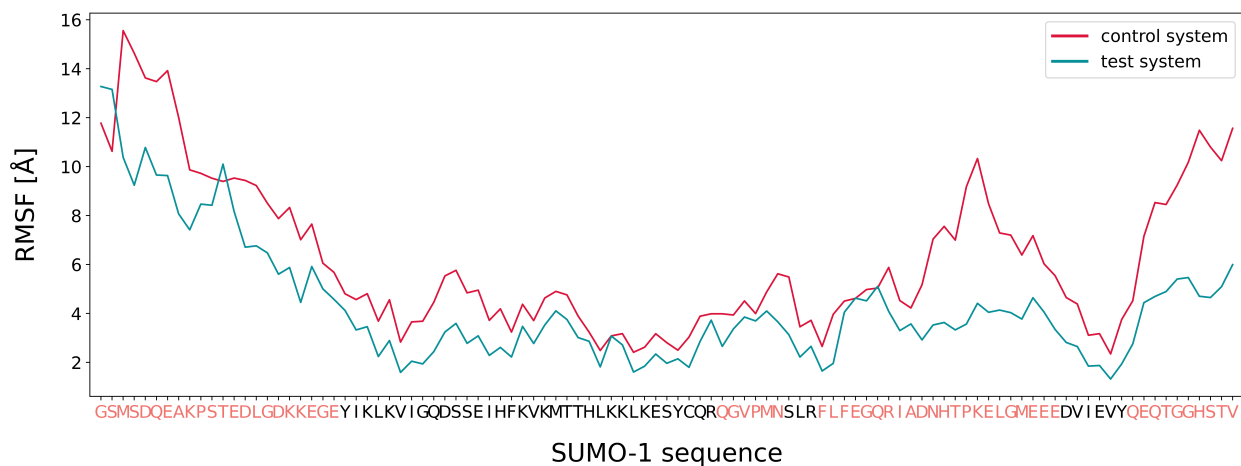

Figure S4: RMSF of SUMO-1, evaluated on the first 325 nanoseconds of the *control* (red) and *test* (blue) trajectory, respectively. Residues belonging to the flexible domains of SUMO-1 are highlighted. These trends match the analysis of the Protein Dispersion Angle ( $PAD_{\omega}$  - see the main text), suggesting a tendency of orthosilicic acid to limit the flexibility of the unstructured moieties of SUMO-1.

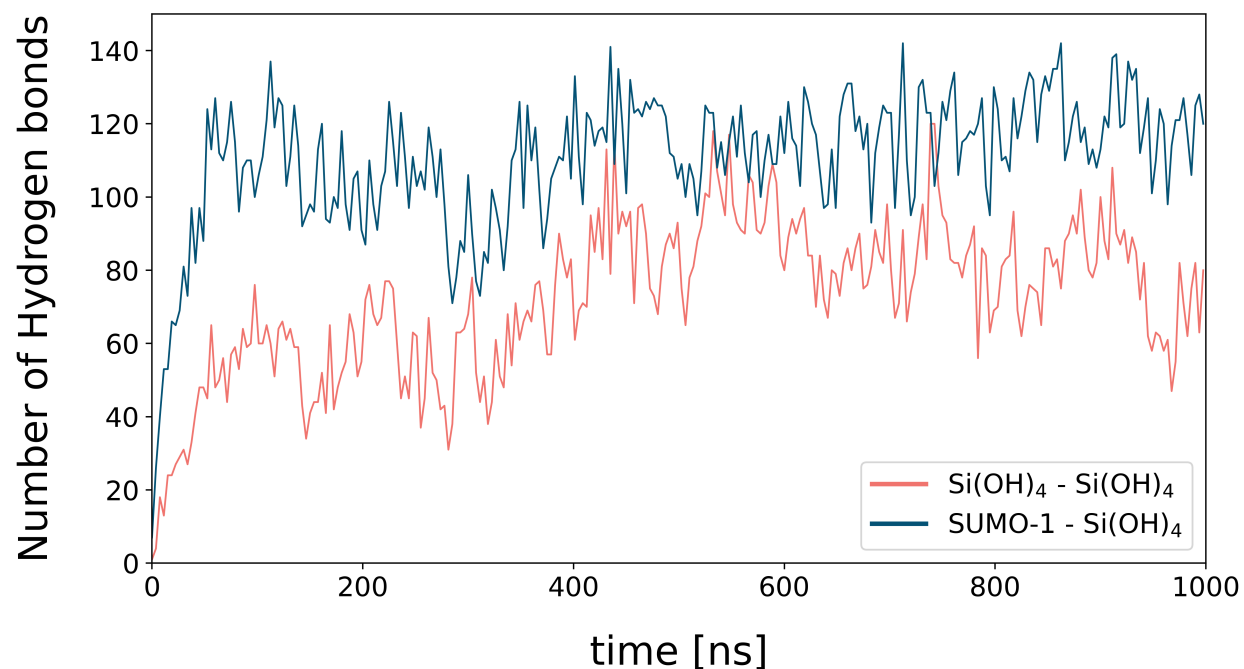

Figure S5: In blue, the total amount of hydrogen bonds between SUMO-1 and  $Si(OH)_4$  molecules. In red, the total amount of hydrogen bonds between  $Si(OH)_4$  molecules belonging to the embedding shell, i.e. lying within 5 Å of the protein surface.



## 4 IL22R $\alpha$ 1 systems

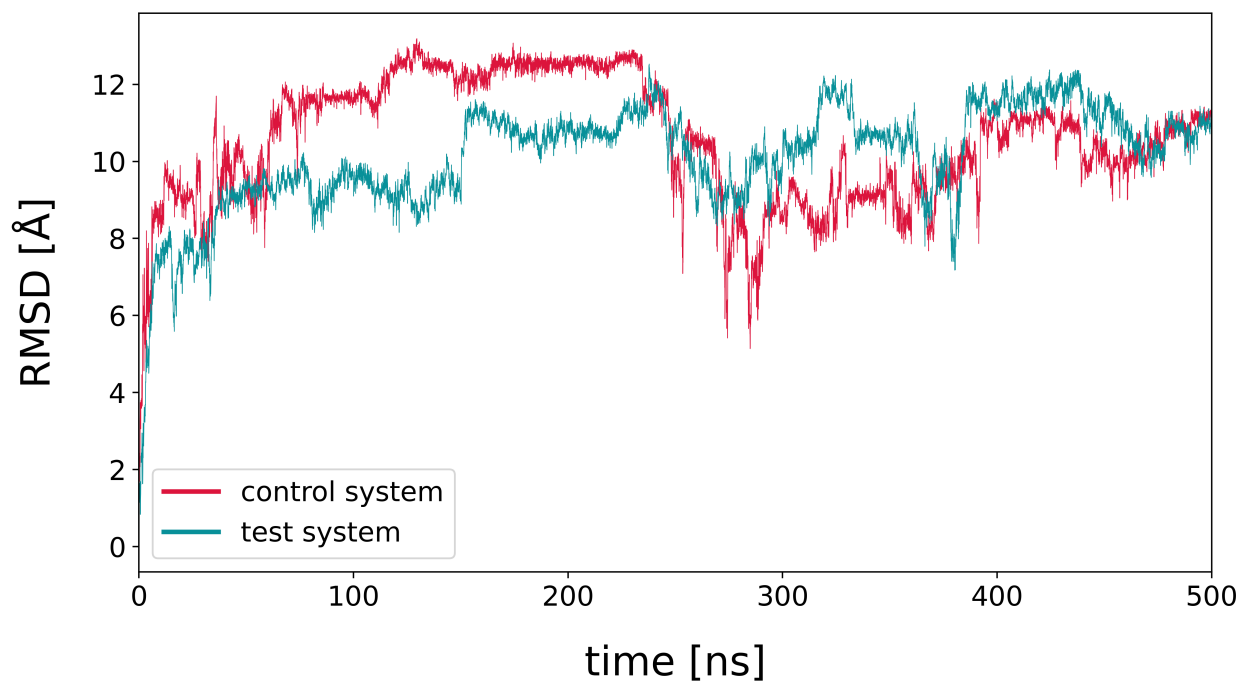

Figure S6: RMSD of the *control* (red) and *test* (blue) trajectories of the transmembrane domain of IL22R $\alpha$ 1.

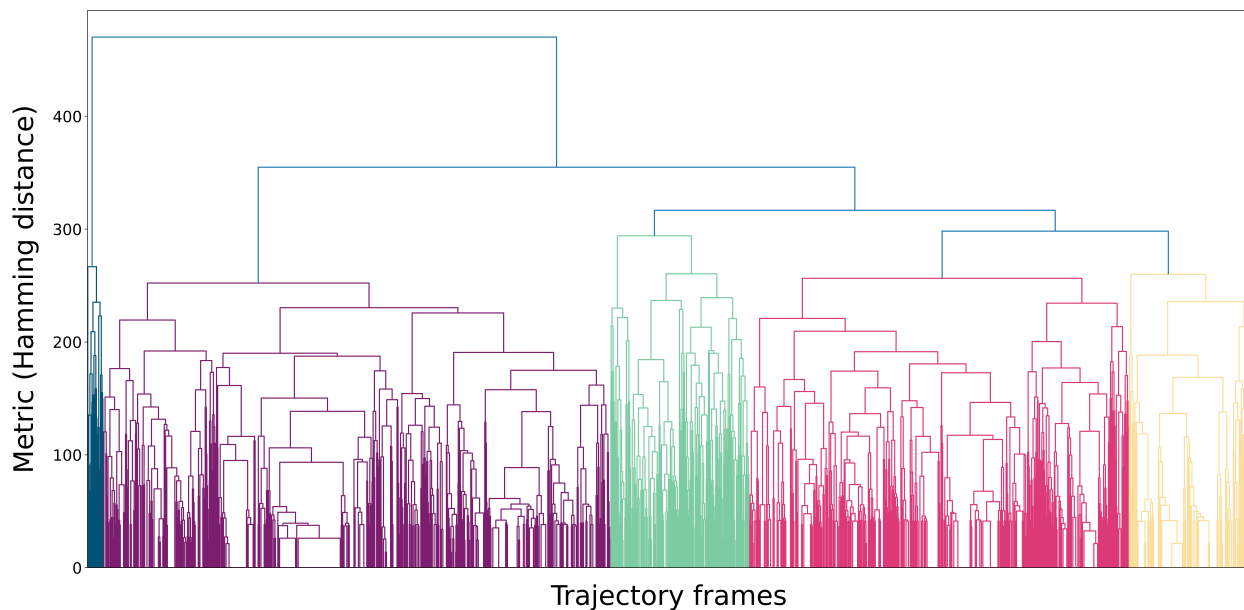

Figure S7: Dendrogram of the hierarchical clustering analysis on the merged (*control*, *test*) trajectory of the transmembrane helix of IL22R $\alpha$ 1, whereby five clusters were isolated based on the dynamical evolution of the secondary structure elements.
